# Supplementary material
Source: publisher figshare collection journal article supplement (https://rs.figshare.com/ndownloader/files/17890544)
Supplement: Supplementary file 1 [file 17890544]

## Sheet: Sheet1
Supplementary Table 4. Fossil taxa included in the biogeographical analysis, their closest crown group relative, stratigraphic age and distribution. Fossil taxa represent genera.
Fossil Taxon	Crown sister	Age (ma)	Distribution	References
Plesiocathartes	Leptosomiformes	33	Europe, North America	Mayr 2002; Weidig 2006
Septentrogon	Trogoniformes	48	Europe	Kristoffersen 2002
Messelirrisor	Bucerotiformes	40	Europe	Mayr 2000
Septencoracias	Coraciidae + Brachypteraciidae	54	Europe	Bourdon et al. 2016
Primobucco	Coraciidae + Brachypteraciidae	51	Europe, North America	Mayr et al. 2004; Ksepka & Clarke 2010
Paracoracias	Coraciidae + Brachypteraciidae	48	North America	Clarke et al. 2009
Miocoracias	Coraciidae	20.4	Europe	Mourer-Chauviré et al. 2013
Paleotodus	Todidae	33.9	Europe, North America	Mourer-Chauviré 1985; Mayr and Kopf 2007
fossil momotid	Momotidae	18.6	North America	Becker 1986
